# Supplementary material
Source: Springer Nature journal article supplement (https://www.springermedizin.de/resource/supplementary/12943_2014_1378_MOESM7_ESM.pdf/9552830)

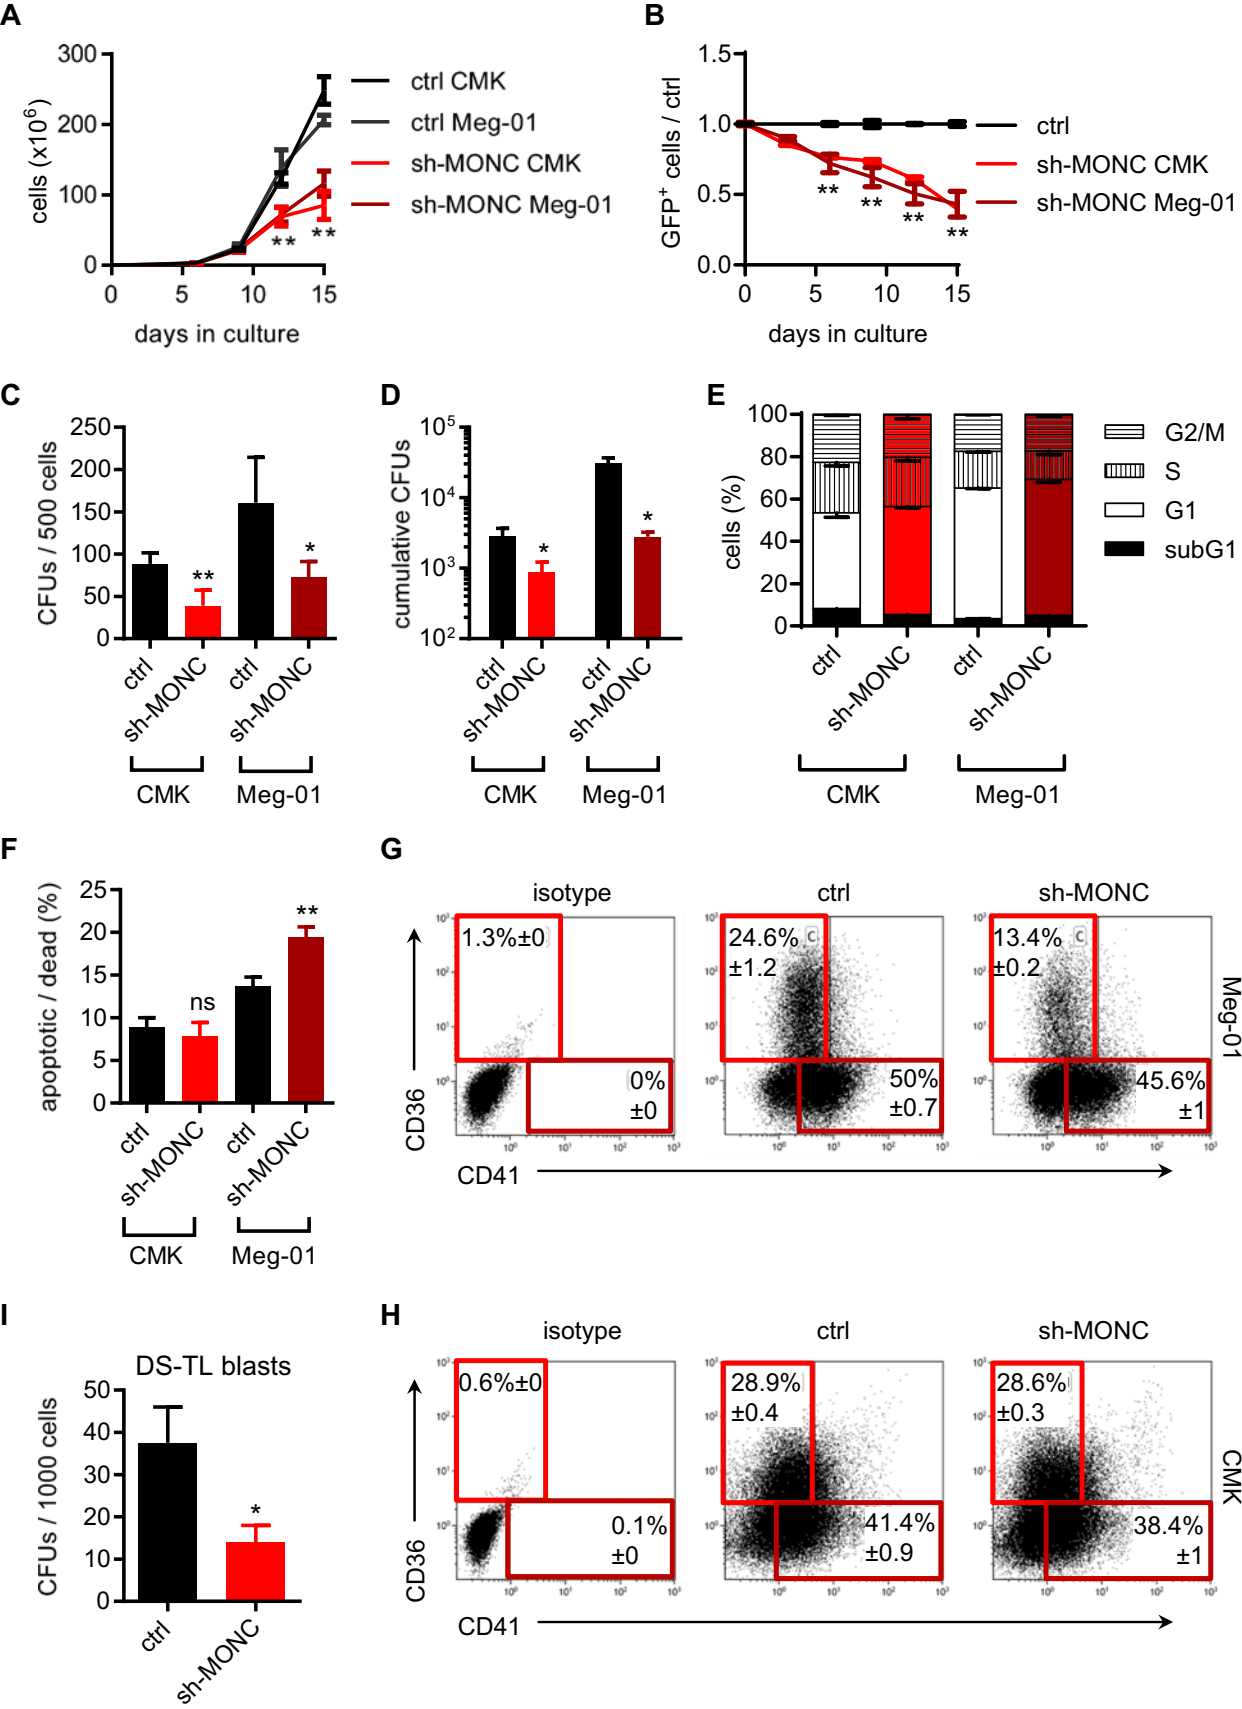

Supplement: MOESM7 [file 9552830]
